# Supplementary material for: Psychological flexibility and the moderating role of the therapeutic working alliance in Acceptance and Commitment Therapy in Daily Life (ACT-DL) in an early psychosis sample
Source: bioRxiv or medRxiv preprint supplement (doi:10.1101/2022.01.19.22269524), 2022-01-19
Supplement: Supplementary file [file media-1.pdf]

## **Supplementary materials**

### *Supplement 1. ESM compliance and validity of the daily life measures*

Compliance to the ESM beep questionnaires started at 39% at baseline, and dropped to approximately 30% at post-intervention and 6-month follow-up. Participants filled in on average 4 out of 6 evening questionnaires at baseline and at 6-month follow-up. ESM evening questionnaire data at post-intervention is missing for all participants due to technical errors.

To assess concurrent validity of global and daily life psychological flexibility, we calculated baseline Pearson-correlations between all person-mean ESM outcomes on the one hand and the baseline FIT-60 total and subscale scores on the other. In-the-moment openness correlated significantly (all  $P < .001$ ) with the open (acceptance, defusion) and aware (self as context, mindfulness) FIT-60 subscales, with moderate to large correlation coefficients between .39 (self as context) and .58 (defusion). Since-the-last-beep openness correlated moderately with total psychological flexibility ( $r = .41$ ;  $p = .011$ ), acceptance ( $r = .30$ ;  $P = .014$ ), defusion ( $r = .37$ ;  $p < .001$ ), and mindfulness ( $r = .31$ ;  $P < .001$ ). Daily psychological flexibility correlated significantly with all ACT processes (all  $P < .01$ ,  $r = .36$  to  $.60$ ). These correlations thus provided support for the convergent validity of our daily life psychological flexibility measures with retrospective psychological flexibility (see Supplementary Table 1).

## Supplementary tables

**Supplementary Table 1.**

Correlations between daily life and global psychological flexibility measures.

| Measure          | In-the-moment<br>openness |         | Since-the-last-<br>beep openness |         | Daily<br>psychological<br>flexibility |         |
|------------------|---------------------------|---------|----------------------------------|---------|---------------------------------------|---------|
|                  | Corr.                     | P-value | Corr.                            | P-value | Corr.                                 | P-value |
| Global PF        | 0.54                      | <.001   | 0.31                             | .011    | 0.59                                  | <.001   |
| Acceptance       | 0.53                      | <.001   | 0.30                             | .014    | 0.36                                  | .001    |
| Defusion         | 0.58                      | <.001   | 0.37                             | <.001   | 0.39                                  | <.001   |
| Mindfulness      | 0.54                      | <.001   | 0.31                             | .009    | 0.44                                  | <.001   |
| Self as context  | 0.39                      | <.001   | 0.15                             | >.999   | 0.43                                  | <.001   |
| Values           | 0.21                      | .360    | 0.03                             | >.999   | 0.60                                  | <.001   |
| Committed action | 0.16                      | >.999   | 0.13                             | >.999   | 0.52                                  | <.001   |

Notes. PF = Psychological flexibility. Data represent Bonferroni corrected pairwise correlations and p-values. Corr. = correlation.

## Supplementary figures

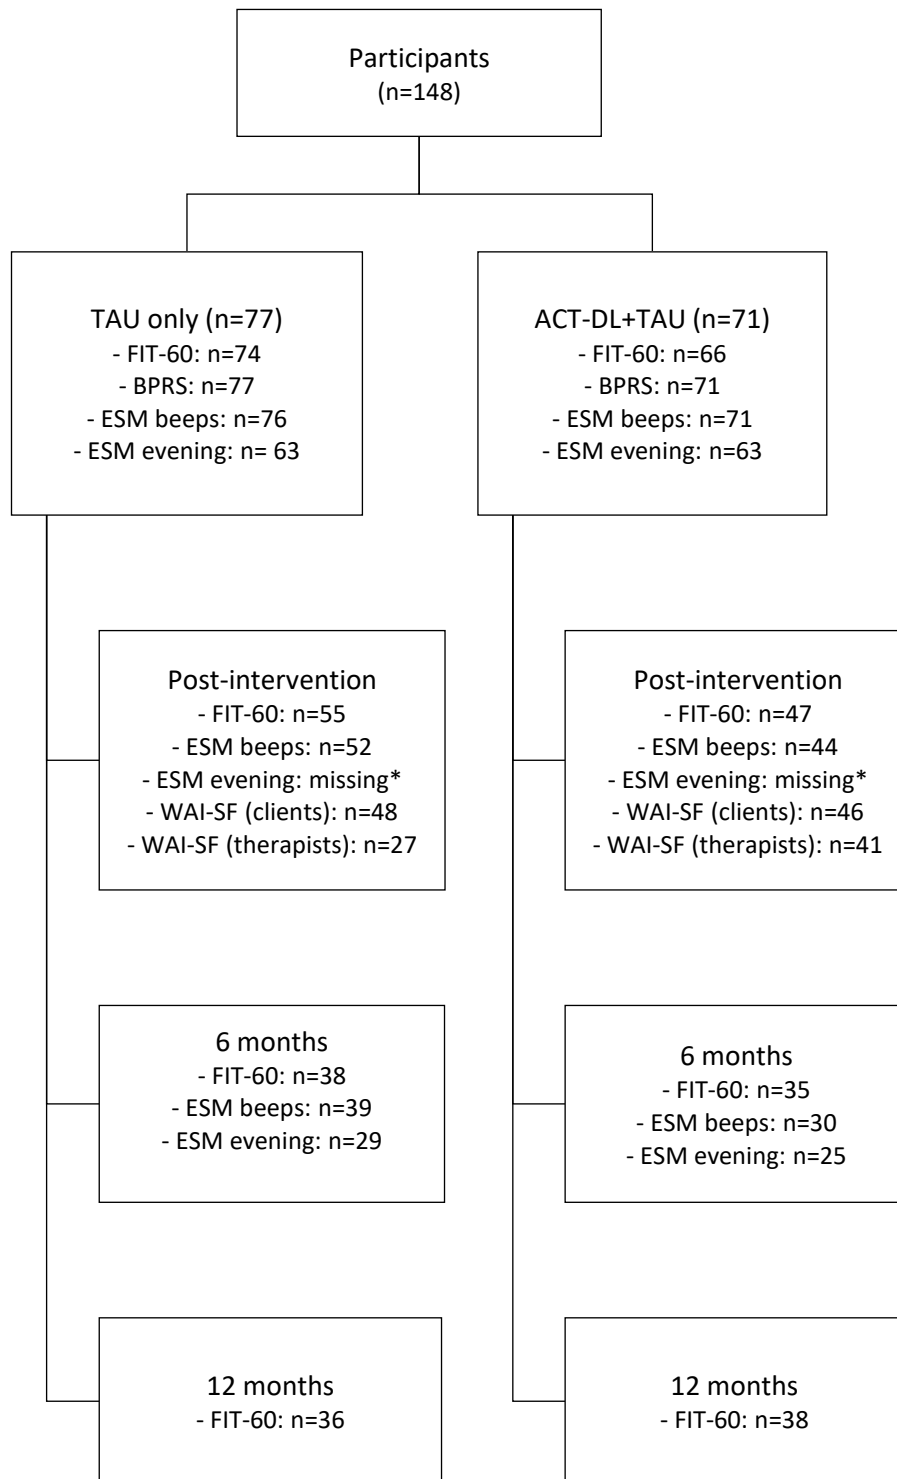

*Supplementary Figure 1.* Study flowchart for ACT-DL processes. \* ESM evening questionnaire data at post-intervention was missing due to technical issues.
